# Supplementary material for: Factors associated with poor mental health outcomes in nurses in COVID-19-designated hospitals in the postepidemic period in Guangdong Province: a cross-sectional study
Source: PubMed Central journal article supplement — BMJ Open. 2022 Jul 18;12(7):e061116. doi: 10.1136/bmjopen-2022-061116 (PMC9297002; doi:10.1136/bmjopen-2022-061116), 2022-07-18
Supplement: bmjopen-2022-061116.draft_revisions.pdf [file bmjopen-2022-061116.draft_revisions.pdf]

# BMJ Open

BMJ Open is committed to open peer review. As part of this commitment we make the peer review history of every article we publish publicly available.

When an article is published we post the peer reviewers' comments and the authors' responses online. We also post the versions of the paper that were used during peer review. These are the versions that the peer review comments apply to.

The versions of the paper that follow are the versions that were submitted during the peer review process. They are not the versions of record or the final published versions. They should not be cited or distributed as the published version of this manuscript.

BMJ Open is an open access journal and the full, final, typeset and author-corrected version of record of the manuscript is available on our site with no access controls, subscription charges or pay-per-view fees (<http://bmjopen.bmj.com>).

If you have any questions on BMJ Open's open peer review process please email [info.bmjopen@bmj.com](mailto:info.bmjopen@bmj.com)

# BMJ Open

## Factors associated with psychological stress in nurses in COVID-19-designated hospitals in the post-epidemic period in China: a cross-sectional study

|                               |                                                                                                                                                                                                                                                                                                                                                                                                                                                   |
|-------------------------------|---------------------------------------------------------------------------------------------------------------------------------------------------------------------------------------------------------------------------------------------------------------------------------------------------------------------------------------------------------------------------------------------------------------------------------------------------|
| Journal:                      | <i>BMJ Open</i>                                                                                                                                                                                                                                                                                                                                                                                                                                   |
| Manuscript ID                 | bmjopen-2022-061116                                                                                                                                                                                                                                                                                                                                                                                                                               |
| Article Type:                 | Original research                                                                                                                                                                                                                                                                                                                                                                                                                                 |
| Date Submitted by the Author: | 25-Jan-2022                                                                                                                                                                                                                                                                                                                                                                                                                                       |
| Complete List of Authors:     | Zhang, Minrou; Shantou University Medical College, Department of Nursing; Guangdong Provincial People's Hospital, Guangdong Academy of Medical Sciences<br>Huang, Huigen; Guangdong Academy of Medical Sciences, Guangdong Academy of Medical Sciences; Shantou University Medical College<br>Chen, Han; Guangdong Academy of Medical Sciences, Guangdong Academy of Medical Sciences<br>Deng, Ya; Southern Medical University, school of nursing |
| Keywords:                     | MENTAL HEALTH, COVID-19, EPIDEMIOLOGY, Health & safety < HEALTH SERVICES ADMINISTRATION & MANAGEMENT                                                                                                                                                                                                                                                                                                                                              |
|                               |                                                                                                                                                                                                                                                                                                                                                                                                                                                   |

SCHOLARONE™  
Manuscripts

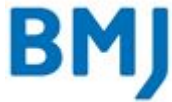

I, the Submitting Author has the right to grant and does grant on behalf of all authors of the Work (as defined in the below author licence), an exclusive licence and/or a non-exclusive licence for contributions from authors who are: i) UK Crown employees; ii) where BMJ has agreed a CC-BY licence shall apply, and/or iii) in accordance with the terms applicable for US Federal Government officers or employees acting as part of their official duties; on a worldwide, perpetual, irrevocable, royalty-free basis to BMJ Publishing Group Ltd ("BMJ") its licensees and where the relevant Journal is co-owned by BMJ to the co-owners of the Journal, to publish the Work in this journal and any other BMJ products and to exploit all rights, as set out in our [licence](#).

The Submitting Author accepts and understands that any supply made under these terms is made by BMJ to the Submitting Author unless you are acting as an employee on behalf of your employer or a postgraduate student of an affiliated institution which is paying any applicable article publishing charge ("APC") for Open Access articles. Where the Submitting Author wishes to make the Work available on an Open Access basis (and intends to pay the relevant APC), the terms of reuse of such Open Access shall be governed by a Creative Commons licence – details of these licences and which [Creative Commons](#) licence will apply to this Work are set out in our licence referred to above.

Other than as permitted in any relevant BMJ Author's Self Archiving Policies, I confirm this Work has not been accepted for publication elsewhere, is not being considered for publication elsewhere and does not duplicate material already published. I confirm all authors consent to publication of this Work and authorise the granting of this licence.

1  
2  
3  
4 Factors associated with psychological stress in nurses in COVID-  
5  
6 19-designated hospitals in the post-epidemic period in China: a  
7  
8 cross-sectional study  
9  
10

11  
12 Minrou, Zhang<sup>2,1</sup>; Huigen Huang<sup>1,2,3</sup>; Hanxi, Chen<sup>1</sup>; Yafang, Deng<sup>3</sup>  
13

14 1 Guangdong Provincial People's Hospital, Guangdong Academy of  
15  
16 Medical Sciences, Guangzhou, China  
17

18  
19 2 Shantou University Medical College, Shantou, China  
20

21  
22 3 School of Nursing, Southern Medical University, Guangzhou, China  
23  
24  
25  
26

27  
28 **Abstract**

29  
30 **Objective:** The early days of the COVID-19 pandemic placed enormous pressure and  
31  
32 subsequent stress on nurses, but at this stage of the year-long COVID-19 outbreak, the  
33  
34 level of stress that nurses experience is unclear. Our study attempted to assess the  
35  
36 factors influencing psychological stress in nurses during the post-epidemic period of  
37  
38 COVID-19.

39  
40 **Design:** Cross-sectional study.

41  
42 **Setting:** COVID-19 designated hospitals.

43  
44 **Participants:** 1,284 Chinese nurses.

45  
46 **Main outcome measures:** Electronic questionnaires, including the Chinese version of  
47  
48 the Perceived Stress Scale (CPSS) and Symptom Checklist-90 (SCL-90), were  
49  
50 distributed for self-evaluation. Regression analysis was used to analyze the  
51  
52 determinants of psychological stress among variables such as age, years of nursing  
53  
54 experience, weekly working hours, anxiety symptoms, somatization symptoms, and  
55  
56 compulsive symptoms.

57  
58  
59 

---

Correspondence to  
60 Dr Huigen Huang; 13822221628@163.com

1  
2  
3  
4 **Results:** A total of 1,284 respondents from COVID-19-designated hospitals in  
5 Guangdong Province were studied. The average CPSS score for all respondents was  
6 22.91±7.12. A total of 38.5% of respondents scored  $\geq 26$  on the CPSS, indicating a  
7 significant degree of psychological stress. Nurses with high psychological stress had  
8 higher levels of anxiety symptoms (41.7% vs. 8.0%) , somatization symptoms (31.4%  
9 vs. 7.7%), and compulsion symptoms (62.3% vs. 27.0%) than nurses with low  
10 psychological stress. Stepwise multiple linear regression revealed that weekly working  
11 hours, years of nursing experience, anxiety symptoms, somatization symptoms, and  
12 compulsion symptoms had a linear relationship with the participants' psychological  
13 stress scores.  
14  
15  
16  
17  
18  
19  
20  
21  
22

23 **Conclusion:** Nurses experienced significant physical and psychological risk while  
24 working in the post epidemic period. Our findings suggest that nurses still need support  
25 to protect their physical and mental health.  
26  
27  
28

29 **Keywords:** COVID-19; pss14; scl-90; mental health; nurses  
30  
31  
32  
33  
34

### 35 **Strengths and limitations of this study**

- 36 ● One of the largest samples of nurses conducted so far in China in COVID-19-  
37 designated hospitals in the post-epidemic period
- 38 ● The following tools used were used alongside the collection of demographic  
39 information: The Chinese version of Perceived Stress Scale (CPSS) and Symptom  
40 Checklist -90 (SCL-90).
- 41 ● Convenience sample that may have missed participants not using social media.
- 42 ● The study used self-reported questionnaires; therefore, data obtained were  
43 participants' subjective perceptions.
- 44 ● It is not clear whether the observed mental health outcomes have irreversible  
45 adverse physical and mental effects on nurses.  
46  
47  
48  
49  
50  
51  
52  
53  
54  
55  
56  
57  
58  
59  
60

## INTRODUCTION

COVID-19 was first identified by Chinese scientists in December 2019<sup>1</sup>. In 2020, the World Health Organization (WHO) declared COVID-19 a pandemic<sup>2</sup>. As of February 1, 2021, 101,039 confirmed cases, 93,726 discharged patients, and 4,826 deaths have been reported in China (including Hong Kong, Macao, and Taiwan). There was one suspected case. A total of 967,415 close contacts were tracked, and 37,319 close contacts were still in medical observation<sup>3</sup>. According to the WHO, by February 28, 2020, more than 100 million people had been infected, and more than 2 million had died<sup>4</sup>. Due to the disease's highly contagious nature, the Chinese government set up designated hospitals to treat patients with symptoms of COVID-19 or those who had already been diagnosed. This situation may lead to great stress for nurses in designated hospitals. Because the virus is transmitted mainly through respiratory droplets or by contact<sup>1</sup>, close environments, such as large gatherings and crowded places, can lead to clustered infections<sup>5</sup>.

Previous studies have found that responding to the severe acute respiratory syndrome (SARS) pandemic took a heavy toll on health care workers and that nurses suffered much more than doctors. Depending on the nature of their work, nurses tend to work in close and long-term contact with patients<sup>6</sup>. Therefore, the psychological stress of nurses during the COVID-19 epidemic deserve more attention. In the early days of the COVID-19 outbreak, numerous reports described physical and psychological morbidity associated with COVID-19<sup>7-10</sup>.

The experience of SARS and Middle East Respiratory Syndrome (MERS) suggests that many health care workers (HCWs) remain mentally ill long after an outbreak is over<sup>11,12</sup>. Therefore, we can expect considerable mass hysteria, such as stress, anxiety, and fear, over the duration of the COVID-19 pandemic. At present, although the COVID-19

1  
2  
3 epidemic has been well controlled in China, the virus has not been completely  
4 eliminated. New infections occur from time to time, which will inevitably impact nurses.  
5  
6 It has been suggested that psychological fear is more dreadful than the disease itself<sup>13</sup>.  
7  
8 However, nurses' mental health has been rarely documented over the course of the  
9  
10 pandemic.  
11

12  
13 In the current pandemic, although the spread of COVID-19 has been effectively  
14 contained in China, nurses who worked in designated hospitals have been under high  
15 pressure to deliver care in highly stressful environments<sup>14</sup>. In addition, nurses working  
16  
17 in COVID-19-designated hospitals (like many other health care workers) are vulnerable  
18  
19 to the risk of infection and unknowingly putting family members and friends at higher  
20  
21 risk. Fear of infection may result in reluctance to seek help from family members or  
22  
23 friends and may reduce nurses' ability to show compassion in the workplace<sup>15</sup>.  
24  
25 Therefore, the lack of long-term tracking of nurses' mental health status precludes the  
26  
27 timely identification and treatment of mental health problems, which is not conducive  
28  
29 to their career development. Our study examined nurses' mental health status and its  
30  
31 influencing factors during a period of COVID-19 containment and normalization.  
32  
33

## 34 35 **METHODS**

### 36 37 **Design and setting**

38  
39 In this study, we recruited nurses from designated hospitals in Guangdong Province.  
40  
41 We conducted a cross-sectional study between January 23 and 31, 2021 using snowball  
42  
43 sampling of nurses. This survey used the form of a questionnaire star, and QR scan  
44  
45 codes to access the questionnaire were posted on WeChat to collect information from  
46  
47 participants. At this questionnaire star link, nurses received guidance on how to  
48  
49 complete and answer the questions. Participants accessed this survey using the  
50  
51 questionnaire star link or QR scan code over a period of nine days. **Participants**

52  
53 All nurses who were at least 18 years of age and worked in COVID-19-designated  
54  
55 hospitals in Guangdong Province were eligible for participation and 1,345 nurses  
56  
57 returned the questionnaire. IP addresses and other personal information were protected  
58  
59 for privacy reasons. Respondents who failed to provide informed consent or took more  
60

1  
2  
3  
4 than 60 minutes to complete the questionnaire were excluded from further consideration,  
5  
6 resulting in a total of 1,284 valid responses.

### 7 **Instrumentation**

8  
9 Demographic characteristics such as sex, gender, marital status, years of nursing  
10  
11 experience, technical title, weekly working hours, and COVID-19 vaccination status  
12  
13 were included. The two instruments used in this study were the Chinese version of the  
14  
15 Perceived Stress Scale (CPSS) and the Symptom Checklist 90 (SCL-90). The Perceived  
16  
17 Stress Scale (PSS) , also known as the Cohen PSS, is the most widely used  
18  
19 psychological instrument for measuring the perception of stress<sup>16</sup>. In 2003, Yang et al.<sup>17</sup>  
20  
21 translated the PSS into Chinese, and the Cronbach's alpha coefficient was 0.78 after  
22  
23 adjustment. Referring to Hewitt<sup>18</sup> (1992), we divided the Chinese version of the PSS  
24  
25 into two dimensions of "perceived distress" and "perceived coping ability" and  
26  
27 conducted reliability and validity tests on nurses. The Cronbach's alpha coefficients of  
28  
29 the total scale and the two dimensions were 0.837, 0.816, and 0.901, respectively.  
30  
31 Scores on the CPSS range from 0 to 56, with scores greater than 26 indicating high  
32  
33 psychological stress.

34  
35 The SCL-90 is a psychosomatic screening scale proposed by Derogatis<sup>19</sup>, and is widely  
36  
37 used in China and elsewhere. In 1986, Chinese scholars applied the SCL-90 to the adult  
38  
39 population and obtained the norm of each factor of the SCL-90. In 2017, a meta-  
40  
41 analysis obtained the norm of the nurse population<sup>20</sup>. The SCL-90 is composed of 90  
42  
43 questions, and each item has five answer choices using five levels (between 1-5, none  
44  
45 = 1, too much = 5). The symptom of interest was considered when the factor score was  
46  
47  $\geq 2$ . In this survey, we chose the anxiety, somatization, and compulsion subscale scores  
48  
49 for analysis. The Cronbach's alpha coefficients of the anxiety, somatization, and  
50  
51 compulsion subscales were 0.921, 0.908, and 0.908, respectively.

### 52 **Ethical issues**

53  
54 Ethical approval was obtained from the Ethics Committee of the Guangdong Provincial  
55  
56 People's Hospital, Guangdong Academy of Medical Sciences (approval number: KY-  
57  
58 Q-2021-023-01).

### 59 **Statistical analysis**

60



1  
2  
3  
4 Data were entered into EXCEL and SPSS Statistics for Windows, Version 23.0 was  
5 used for statistical analysis. The counting data were described by frequency and  
6 composition ratios, and the measurement data were expressed as  $X \pm s$ . We divided anxiety,  
7 somatization, and compulsion factor scores that were  $\geq 2$  into one group and  $< 2$  into the other  
8 group. PSS scores  $\geq 26$  and  $< 26$  were divided into two groups, and the Chi-square  $\chi^2$  was  
9 used for univariate analysis. Stepwise multiple linear regression analysis was used to  
10 evaluate the factors associated with psychological stress. The standard of significance  
11 was  $P < 0.05$ .

### 12 13 14 15 16 17 18 19 **Patient and public involvement**

20 No patient involved.

## 21 22 23 **RESULTS**

24 There were a total of 1,345 respondents from COVID-19-designated hospitals in  
25 Guangdong Province. We excluded respondents who disagreed with the survey ( $n =$   
26 22) and took too long to complete the questionnaire ( $n = 39$ ), resulting in a final analytic  
27 sample of 1,284 respondents. The questionnaire completion time was  $476.03 \pm 322.93$   
28 seconds. Respondents were primarily female (95.7%), over the age of 30 (56.95),  
29 married (70.2%), and had more than 10 years of work experience as a nurse (48%).  
30 Table 1 lists the mean scores on the CPSS by demographic characteristics.

31 The mean psychological stress measured by the CPSS was  $22.91 \pm 7.12$ . In our study,  
32 38.5% of respondents reported high psychological stress ( $n = 494$ ), and 61.5% of  
33 respondents reported low psychological stress ( $n = 790$ ). Table 2 list the scoring of  
34 psychological stress.

35 We divided the respondents into two groups: 1) one group of those who had a  
36 psychological stress score  $\geq 26$  and 2) another group of those who had a psychological  
37 stress score  $< 26$ . We then conducted univariate analysis. The results showed that there  
38 was no significant difference in psychological stress by gender or COVID-19  
39 vaccination status ( $P > 0.05$ ). The results revealed a significant difference in age ( $\chi^2 =$   
40 14.912,  $p = 0.170$ ), marital status ( $\chi^2 = 7.648$ ,  $p = 0.022$ ), years of work experience as  
41 a nurse ( $\chi^2 = 18.360$ ,  $p = 0.001$ ), technical title ( $\chi^2 = 15.659$ ,  $p = 0.001$ ), weekly working  
42  
43  
44  
45  
46  
47  
48  
49  
50  
51  
52  
53  
54  
55  
56  
57  
58  
59  
60

hours ( $x^2 = 16.675$ ,  $p < 0.001$ ), anxiety symptoms ( $x^2 = 208.748$ ,  $p < 0.001$ ), somatization symptoms ( $x^2=121.546$ ,  $p<0.001$ ), and compulsion symptoms ( $x^2 = 157.842$ ,  $p < 0.001$ ). In addition, people who worked more than 40 hours a week reported higher levels of psychological stress than those who worked 35-40 hours a week ( $p < 0.001$ ). Table 3 summarizes the results.

We defined psychological level as the dependent variable, and the significant variables from the univariate analysis in Table 3 as the independent variables. Our analysis showed that having less than 15 years of nursing service ( $\beta = -0.100$ ,  $p < 0.001$ ), working more than 40 hours a week ( $\beta = 0.087$ ,  $p < 0.001$ ), anxiety symptoms ( $\beta = 0.235$ ,  $p < 0.001$ ), somatization symptoms ( $\beta = 0.095$ ,  $p = 0.002$ ) and compulsion symptoms ( $\beta = 0.266$ ,  $p < 0.001$ ) were identified as risk factors for psychological stress (Table 4).

Table 1 Mean scores on the CPSS by demographic characteristics(N=1284).

| Variables                                   | N (%)                  | mean CPSS<br>scores<br>$\bar{x} \pm s$ | 95% CI         |                |       |
|---------------------------------------------|------------------------|----------------------------------------|----------------|----------------|-------|
|                                             |                        |                                        | Lower<br>Bound | Upper<br>Bound |       |
| Gender                                      | male                   | 55(4.3%)                               | 23.25±6.66     | 21.45          | 25.06 |
|                                             | female                 | 1229(95.7%)                            | 22.89±7.14     | 22.49          | 23.29 |
| Age<br>(year)                               | ≤25                    | 193(15.0%)                             | 23.87±6.75     | 22.91          | 24.83 |
|                                             | 26-30                  | 359(28.0%)                             | 23.47±7.21     | 22.72          | 24.22 |
|                                             | 31-35                  | 315(24.5%)                             | 22.82±6.87     | 22.06          | 23.58 |
|                                             | 36-40                  | 188(14.6%)                             | 22.53±7.13     | 21.50          | 23.55 |
|                                             | ≥41                    | 229(17.8%)                             | 21.66±7.45     | 20.69          | 22.63 |
| Marital status                              | Married                | 902(70.2%)                             | 22.51±7.24     | 22.04          | 22.99 |
|                                             | Unmarried              | 371(28.9%)                             | 23.86±6.68     | 23.18          | 24.55 |
|                                             | Others                 | 11(0.9%)                               | 23.36±8.32     | 17.77          | 28.95 |
| Years of<br>nursing<br>experience<br>(year) | ≤5                     | 344(26.8%)                             | 23.49±6.72     | 22.77          | 24.20 |
|                                             | 6-10                   | 324(25.2%)                             | 23.58±7.27     | 22.79          | 24.38 |
|                                             | 11-15                  | 258(20.1%)                             | 22.17±7.28     | 22.17          | 23.95 |
|                                             | 16-20                  | 153(11.9%)                             | 21.64±6.64     | 20.58          | 22.70 |
|                                             | ≥21                    | 205(16.0%)                             | 21.64±7.42     | 20.62          | 22.67 |
| Technical<br>Title                          | Nurses                 | 348(27.1%)                             | 23.72±6.68     | 23.01          | 24.41 |
|                                             | Nurse<br>Practitioners | 570(44.4%)                             | 22.97±7.34     | 22.37          | 23.58 |
|                                             | Nurse<br>Supervisor    | 312(24.3%)                             | 22.33±7.18     | 21.53          | 23.13 |

|               |            |             |            |       |       |
|---------------|------------|-------------|------------|-------|-------|
|               | Associate  |             |            |       |       |
|               | Senior and | 54(4.2%)    | 20.41±6.38 | 18.67 | 22.15 |
|               | above      |             |            |       |       |
| Weekly        | <35        | 51(4.0%)    | 22.65±8.27 | 20.32 | 24.97 |
| working       | 35-40      | 549(42.8%)  | 22.02±6.78 | 21.45 | 22.59 |
| hours         | >40        | 684(53.3%)  | 23.64±7.21 | 23.10 | 24.19 |
| Vaccination   | Yes        | 317(24.7%)  | 22.88±6.72 | 22.14 | 23.63 |
| with COVID-19 | No         | 967(75.3%)  | 22.92±7.25 | 22.46 | 23.38 |
| Anxiety       | Yes (≥2)   | 269(21.0%)  | 29.06±5.73 | 28.37 | 29.75 |
| symptoms      | No (<2)    | 1015(79.0%) | 21.28±6.53 | 20.88 | 21.68 |
| somatization  | Yes (≥2)   | 216(16.8%)  | 28.69±6.30 | 27.84 | 29.54 |
| symptoms      | No (<2)    | 1068(83.2%) | 21.74±6.69 | 21.34 | 22.14 |
| compulsion    | Yes (≥2)   | 521(40.6%)  | 26.79±6.05 | 26.27 | 27.31 |
| symptoms      | No (<2)    | 763(59.4%)  | 20.26±6.56 | 19.80 | 20.73 |

Table 2 Scoring of psychological stress.

| Variables            | N (%)      | X ± s      | 95% CI      |             |
|----------------------|------------|------------|-------------|-------------|
|                      |            |            | Lower Bound | Upper Bound |
| Psychological stress | 1284(100%) | 22.91±7.12 | 22.52       | 23.30       |
| High (≥26)           | 494(38.5%) | 29.76±3.84 | 29.42       | 30.10       |
| Low (<26)            | 790(61.5%) | 18.63±5.04 | 18.28       | 18.98       |
| Perceived Distress   | 1284(100%) | 11.60±4.32 | 11.36       | 11.83       |
| Perceived coping     | 1284(100%) | 11.31±4.98 | 11.04       | 11.59       |

Table 3 Univariate analyses of the factors associated with psychological stress(N=1284).

| Variables        | PSS score≥26 (n=494) | PSS score<26 (n=790) | x <sup>2</sup> | p      |        |
|------------------|----------------------|----------------------|----------------|--------|--------|
|                  |                      |                      |                |        | Gender |
|                  | female               | 468(94.7%)           | 761(96.3%)     |        |        |
|                  | ≤25                  | 90(18.2%)            | 103(13.0%)     |        |        |
|                  | 26-30                | 148(30.0%)           | 211(26.7%)     |        |        |
| Age (year)       | 31-35                | 123(24.9%)           | 192(24.3%)     | 14.912 | .005*  |
|                  | 36-40                | 64(13.0%)            | 124(15.7%)     |        |        |
|                  | ≥41                  | 69(14.0%)            | 160(20.3%)     |        |        |
| Marital status   | Married              | 325(65.8%)           | 577(73.0%)     |        |        |
|                  | Single               | 164(33.2%)           | 207(26.2%)     | 7.648  | .022*  |
|                  | Others               | 5(1.0%)              | 6(.8%)         |        |        |
| Years of nursing | ≤5                   | 145(29.4%)           | 199(25.2%)     | 18.360 | .001*  |

|                           |                            |            |            |         |       |
|---------------------------|----------------------------|------------|------------|---------|-------|
| experience(year)          | 6-10                       | 141(28.5%) | 183(23.2%) |         |       |
|                           | 11-15                      | 103(20.9%) | 155(19.6%) |         |       |
|                           | 16-20                      | 44(8.9%)   | 109(13.8%) |         |       |
|                           | ≥21                        | 61(12.3%)  | 144(18.2%) |         |       |
|                           | Nurses                     | 151(30.6%) | 197(24.9%) |         |       |
|                           | Nurse Practitioners        | 229(46.4%) | 341(43.2%) |         |       |
| Technical Title           | Nurse Supervisor           | 103(20.9%) | 209(26.5%) | 15.659  | .001* |
|                           | Associate Senior and above | 11(2.2%)   | 43(5.4%)   |         |       |
| Weekly working hours      | <35                        | 22(4.5%)   | 29(3.7%)   |         |       |
|                           | 35-40                      | 176(35.6%) | 373(47.2%) | 16.675  | .000* |
|                           | >40                        | 296(59.9%) | 388(49.1%) |         |       |
| Vaccination with COVID-19 | Yes                        | 121(24.5%) | 196(24.8%) | 0.016   | .898  |
|                           | No                         | 373(75.5%) | 594(75.2%) |         |       |
| Anxiety symptoms          | Yes (≥2)                   | 206(41.7%) | 63(8.0%)   | 208.748 | .000* |
|                           | No (<2)                    | 288(58.3%) | 727(92.0%) |         |       |
| somatization symptoms     | Yes (≥2)                   | 155(31.4%) | 61(7.7%)   | 121.546 | .000* |
|                           | No (<2)                    | 339(68.6%) | 729(92.3%) |         |       |
| compulsion symptoms       | Yes (≥2)                   | 308(62.3%) | 213(27.0%) | 157.842 | .000* |
|                           | No (<2)                    | 186(27.7%) | 577(73%)   |         |       |

\* $P < 0.05$ . PSS, perceived stress scale.

Table 4 Multivariate liner regression analysis of psychological stress.

| Variables                   | <i>B</i> | <i>SE</i> | $\beta$ | <i>p</i> | 95% <i>CI</i> |             |
|-----------------------------|----------|-----------|---------|----------|---------------|-------------|
|                             |          |           |         |          | Lower Bound   | Upper Bound |
| compulsion symptoms         | 3.859    | 0.428     | 0.266   | 0.000    | 3.019         | 4.699       |
| Anxiety symptoms            | 4.102    | 0.574     | 0.235   | 0.000    | 2.975         | 5.229       |
| Years of nursing experience | -0.509   | 0.122     | -0.100  | 0.000    | -0.748        | -0.270      |
| Weekly working hours        | 1.075    | 0.295     | 0.087   | 0.000    | 0.496         | 1.653       |
| somatization symptoms       | 1.812    | 0.597     | 0.095   | 0.002    | 0.640         | 2.983       |

$R^2 = 0.278$ , adjust  $R^2 = 0.275$ ,  $F = 98.510$ ,  $p < 0.001$ .

## DISCUSSION

In the study, we found some mental health problems among nurses during the normalization of COVID-19 prevention and control. First, although the whole sample showed that nurses were experiencing relatively normal levels of psychological stress, 38.5% of nurses had a high level of stress, which is a significant portion that cannot be

1  
2  
3  
4 ignored. Second, the ability to perceive stress in the high psychological stress group  
5 was higher than that in the low psychological stress group, and this difference was  
6 statistically significant. Finally, the results of this study also indicate that anxiety,  
7 somatization, and obsessive-compulsive symptoms can aggravate nurses'  
8 psychological stress.  
9

10  
11  
12  
13 Our study revealed that the median level of psychological stress among nurses was 23.  
14 Other studies found higher levels of psychological stress among students and other  
15 health workers in the early stages of the COVID-19 outbreak<sup>21 22</sup>. We found that 98.5%  
16 of nurses were taught about infectious diseases. Psychological effects of COVID-19  
17 were more common among health care workers without medical training than among  
18 those with medical training<sup>23</sup>. Over time, adaptive responses to stress and the positive  
19 effects of infection control training may be protective<sup>24</sup>. Scholars investigated the  
20 psychological status of HCWs during SARS and found that 39.3% of the general  
21 population had elevated psychological stress levels<sup>25</sup>, while approximately 38.5% of  
22 the nurses in our study showed high psychological stress. This reduction may be related  
23 to experience in the fight against COVID-19 today and the timely and effective  
24 response to the epidemic, and its prevention and control in Guangdong<sup>26</sup>.  
25

26  
27  
28  
29 Our study identified weekly working hours, and symptoms of anxiety, somatization, and  
30 compulsiveness as potential risk factors for psychological stress in nurses, whereas  
31 years of nursing experience was protective against the development of psychological  
32 stress. Nurses who worked more than 40 hours a week reported significantly higher  
33 levels of psychological stress than those who worked less than 40 hours a week. This  
34 result may be related to extended work hours leading to nursing errors, such as patient  
35 identification errors, communication errors, and patient complaints<sup>27</sup>. At the same time,  
36 longer work hours may result in more severe conflicts between work-life balance for  
37 female workers<sup>28</sup>. Years of nursing experience being a protective factor may be  
38 attributed to greater capabilities to cope with emergencies and improved psychological  
39 quality.  
40

41  
42  
43  
44  
45  
46  
47  
48  
49  
50  
51  
52  
53  
54  
55  
56  
57  
58  
59  
60  
A certain level of psychological stress can lead to psychological disorders, such as  
anxiety and somatization symptoms. Conversely, anxiety and somatization symptoms

1  
2  
3  
4 can also cause psychological stress to rise<sup>29</sup>. In the high psychological stress group, we  
5 found that 41.7% and 31.4% of nurses suffered from anxiety and somatization,  
6 respectively. Huang et al. reported that the percentages of anxiety and somatization  
7 were 33.02% and 7.59%, respectively, in the Chinese population<sup>30</sup>, which are lower  
8 than that of the nurses in our study. This result may be attributed to the fact that nurses  
9 are more likely to be exposed to COVID-19 than those in the general population.  
10  
11 However, Li et al. reported that the frequencies of symptoms of anxiety and  
12 somatization symptoms were 45.4% and 12.0%, respectively<sup>31</sup>. In our survey, 26.1%  
13 of nurses received psychological counseling, which may have led to a slight decrease  
14 in anxiety symptoms. However, spending increasingly more time working in high-  
15 pressure environment may cause nurses to develop headaches and other somatic  
16 symptoms. Compulsive symptoms were reported in 62.3% of nurses, which contrasts  
17 with an online survey of 927 Chinese medical workers conducted between February  
18 19 and March 6, 2020 which showed a prevalence of compulsive symptoms of only  
19 5.3%<sup>10</sup>. The reason for this large discrepancy may be that 85.1% of the latter medical  
20 staff were not at risk of exposure to COVID-19 patients in the hospital.

21  
22 Our findings have important clinical implications for alleviating high levels of  
23 psychological stress in nurses. Reasonable work schedules and proper education on  
24 infection control can relieve nurses experiencing high psychological stress.

### 25 26 27 28 29 30 31 32 33 34 35 36 37 38 39 40 41 **Limitations**

42 We acknowledge that our study has some limitations. First, although we had a large  
43 sample size and attempted to capture all nurses working at designated hospitals, male  
44 nurses population in designated hospitals in Guangdong Province were  
45 underrepresented. Second, self-report questionnaires were used in this study, and the  
46 data obtained were participants' perceptions, which are highly subjective. Third, this  
47 study can only highlight the status quo of psychological stress, anxiety, compulsion,  
48 and somatization of nurses during the investigation period and cannot determine  
49 whether there are irreversible adverse physical and mental effects on nurses. Finally,  
50 the study was conducted online using convenience sampling, which may have missed  
51 some participants.  
52  
53  
54  
55  
56  
57  
58  
59  
60

1  
2  
3  
4 Despite the above limitations, our study provided valuable information on the  
5 psychological impact of the COVID-19 pandemic on nurses in China. People's mental  
6 conditions will change with time and the environment, as will their psychological stress.  
7  
8 Therefore, coping strategies across periods may differ, and the effectiveness of these  
9 strategies needs further study. Further research will need to expand our findings with  
10 additional surveys in other provinces in China.  
11  
12  
13  
14

## 15 **CONCLUSION**

16  
17 This survey found that 38.5% of nurses still suffered high psychological stress, and  
18 there was a significant association between anxiety symptoms, somatization symptoms,  
19 compulsion symptoms, with psychological stress. Considering the current situation, we  
20 suggest using an online platform to provide psychological support for nurses. For nurses  
21 with severe psychiatric symptoms or even somatic symptoms, we recommend  
22 individualized psychological support and interventions after ruling out infection. The  
23 COVID-19 pandemic is a public health challenge that puts health systems in a highly  
24 vulnerable position<sup>21</sup>. Nurses are an important part of the health care system. Therefore,  
25 we must ensure the physical and mental health of nurses to help them meet the future  
26 challenges in their future careers.  
27  
28  
29  
30  
31  
32  
33  
34  
35  
36

37 **Acknowledgments** We thank all the nursing departments of 33 designated hospitals in  
38 Guangdong Province, China, for their support for our study.  
39

40  
41 **Contributor** Minrou, Zhang was involved in the conception of the study, data  
42 collection, analysis, and writing of the main manuscript. Huigen, Huang, the  
43 corresponding author, was involved in conception, data collection, analysis, and critical  
44 revision of the manuscript. Hanxi, Chen was involved in conception. Yafang, Deng was  
45 involved in the data analysis. All authors approved the final manuscript.  
46  
47  
48  
49  
50

51 **Funding** None.

52 **Competing interests** None.

53 **Patient consent for publication** Not required.

54 **Provenance and peer review** Not commissioned; externally peer reviewed.

55  
56  
57 **Date availability statement** No additional data available.  
58  
59  
60

## References

1. Li Q, Guan X, Wu P, et al. Early Transmission Dynamics in Wuhan, China, of Novel Coronavirus-Infected Pneumonia. *N Engl J Med* 2020;382(13):1199-207. doi: 10.1056/NEJMoa2001316 [published Online First: 2020/01/30]
2. Swerdlow DL, Finelli L. Preparation for Possible Sustained Transmission of 2019 Novel Coronavirus: Lessons From Previous Epidemics. *JAMA* 2020;323(12):1129-30. doi: 10.1001/jama.2020.1960 [published Online First: 2020/03/25]
3. Commission CNHaW. Update on the new coronavirus pneumonia outbreak as of 24:00 on February 1 2021 [updated 02-02. Available from: <http://www.nhc.gov.cn/yjb/s7860/202102/0d8063f3406d4897ae63cd323f724f76.shtml> accessed 02-03 2021.
4. Organization WH. WHO Coronavirus Disease (COVID-19) Dashboard 2021 [updated 02-28. Available from: <https://covid19.who.int/>. accessed 03-01 2021.
5. Wang Y, Di Y, Ye J, et al. Study on the public psychological states and its related factors during the outbreak of coronavirus disease 2019 (COVID-19) in some regions of China. *Psychol Health Med* 2021;26(1):13-22. doi: 10.1080/13548506.2020.1746817 [published Online First: 2020/04/01]
6. Galletta M, Piras I, Finco G, et al. Worries, Preparedness, and Perceived Impact of Covid-19 Pandemic on Nurses' Mental Health. *Front Public Health* 2021;9:566700. doi: 10.3389/fpubh.2021.566700 [published Online First: 2021/06/15]
7. Alshekaili M, Hassan W, Al Said N, et al. Factors associated with mental health outcomes across healthcare settings in Oman during COVID-19: frontline versus non-frontline healthcare workers. *BMJ Open* 2020;10(10):e042030. doi: 10.1136/bmjopen-2020-042030 [published Online First: 2020/10/12]
8. Song X, Fu W, Liu X, et al. Mental health status of medical staff in emergency departments during the Coronavirus disease 2019 epidemic in China. *Brain Behav Immun* 2020;88:60-65. doi: 10.1016/j.bbi.2020.06.002 [published Online First: 2020/06/09]
9. Chew NWS, Lee GKH, Tan BYQ, et al. A multinational, multicentre study on the psychological outcomes and associated physical symptoms amongst healthcare workers during COVID-19 outbreak. *Brain Behav Immun* 2020;88:559-65. doi: 10.1016/j.bbi.2020.04.049 [published Online First: 2020/04/25]
10. Zhang WR, Wang K, Yin L, et al. Mental Health and Psychosocial Problems of Medical Health Workers during the COVID-19 Epidemic in China. *Psychother Psychosom* 2020;89(4):242-50. doi: 10.1159/000507639 [published Online First: 2020/04/10]
11. Carmassi C, Foghi C, Dell'Oste V, et al. PTSD symptoms in healthcare workers facing the three coronavirus outbreaks: What can we expect after the COVID-19 pandemic. *Psychiatry research* 2020;292:113312. doi: 10.1016/j.psychres.2020.113312 [published Online First: 2020/07/28]
12. Tham KY, Tan YH, Loh OH, et al. Psychiatric morbidity among emergency department doctors and nurses after the SARS outbreak. *Annals of the Academy of Medicine, Singapore* 2004;33(5 Suppl):S78-9. [published Online First: 2005/01/18]
13. Chinanews. Zhongnanshan:more attention should be paid to mental health in epidemic treatment. *Chinanews* 2020.
14. Leng M, Wei L, Shi X, et al. Mental distress and influencing factors in nurses caring for patients with COVID-19. *Nurs Crit Care* 2021;26(2):94-101. doi: 10.1111/nicc.12528 [published Online First:



- 2021/01/16]
15. Alharbi J, Jackson D, Usher K. Personal characteristics, coping strategies, and resilience impact on compassion fatigue in critical care nurses: A cross-sectional study. *Nurs Health Sci* 2020;22(1):20-27. doi: 10.1111/nhs.12650 [published Online First: 2019/11/02]
  16. Klein EM, Braehler E, Dreier M, et al. The German version of the Perceived Stress Scale - psychometric characteristics in a representative German community sample. *BMC Psychiatry* 2016;16:159. doi: 10.1186/s12888-016-0875-9 [published Online First: 2016/05/25]
  17. Ting-zhong Y, Han-teng H. An epifirmiological study among urban residents in social transition period. *Chin J Epidemiol* 2003;24(9):760-64. doi: 10.3760/j.issn:0254-6450.2003.09.004
  18. Hewitt PL, Flett GL, Monsher SW. The Preceived Stress Scale: Factor structure and relation to depression symptoms in a psychiatric sample. *Journal of Psychopathology and Behavioral Assessment* 1992;14(3):247-57. doi: 10.1007/bf00962631
  19. Derogatis LR, Rickels K, Rock AF. The SCL-90 and the MMPI: a step in the validation of a new self-report scale. *Br J Psychiatry* 1976;128:280-9. doi: 10.1192/bjp.128.3.280 [published Online First: 1976/03/01]
  20. Fang B, Caixia L. Meta-analysis of mental health investigation for Chinese nurses evaluted by SCL-90 during recent 5 years. *Journal of Nursing Science* 2017;32(5):1-4. doi: 10.3870/j.issn.1001-4152.2017.05.001
  21. Gonzalez-Gil MT, Gonzalez-Blazquez C, Parro-Moreno AI, et al. Nurses' perceptions and demands regarding COVID-19 care delivery in critical care units and hospital emergency services. *Intensive Crit Care Nurs* 2021;62:102966. doi: 10.1016/j.iccn.2020.102966 [published Online First: 2020/11/12]
  22. Aslan I, Ochnik D, Cinar O. Exploring Perceived Stress among Students in Turkey during the COVID-19 Pandemic. *Int J Environ Res Public Health* 2020;17(23) doi: 10.3390/ijerph17238961 [published Online First: 2020/12/06]
  23. Tan BYQ, Chew NWS, Lee GKH, et al. Psychological Impact of the COVID-19 Pandemic on Health Care Workers in Singapore. *Annals of internal medicine* 2020;173(4):317-20. doi: 10.7326/m20-1083 [published Online First: 2020/04/07]
  24. Chua SE, Cheung V, Cheung C, et al. Psychological effects of the SARS outbreak in Hong Kong on high-risk health care workers. *Canadian journal of psychiatry Revue canadienne de psychiatrie* 2004;49(6):391-3. doi: 10.1177/070674370404900609 [published Online First: 2004/07/31]
  25. Shu-hong L, Ben-chun T, Ting-zhong Y, et al. Perceived stress ingeneral public during prevalence of severe acute. *Chin J Prev Med* 2010;44(2):128-33. doi: 10.3760/cma.j.issn.0253-9624.2010.02.009
  26. Qian-yi L, Chan Y, Dong-ao Z, et al. Investigation of mental health status of frontline medical staff in COVID-19 treatment hospital in Guangdong Province. *Guangdong Medical Journal* 2020;41(10):984-90. doi: 10.13820/j.cnki.gdyx.20200920
  27. Kunaviktikul W, Wichaikhum O, Nantsupawat A, et al. Nurses' extended work hours: Patient, nurse and organizational outcomes. *International nursing review* 2015;62(3):386-93. doi: 10.1111/inr.12195 [published Online First: 2015/05/23]
  28. Shanafelt TD, Noseworthy JH. Executive Leadership and Physician Well-being: Nine Organizational Strategies to Promote Engagement and Reduce Burnout. *Mayo Clin Proc* 2017;92(1):129-46. doi: 10.1016/j.mayocp.2016.10.004 [published Online First: 2016/11/23]
  29. Chen B. The study on management stratify of public health emergency based on the adjustment of

1  
2  
3 Systematic Strain [硕士]. Zhejiang University, 2007.

- 4 30. Huang Y, Wang Y, Zeng L, et al. Prevalence and Correlation of Anxiety, Insomnia and Somatic  
5 Symptoms in a Chinese Population During the COVID-19 Epidemic. *Front Psychiatry*  
6 2020;11:568329. doi: 10.3389/fpsy.2020.568329 [published Online First: 2020/10/03]  
7  
8 31. Li H, Zhang Y, Wang H, et al. <p>The Relationship Between Symptoms of Anxiety and Somatic  
9 Symptoms in Health Professionals During the Coronavirus Disease 2019 Pandemic</p>.  
10 *Neuropsychiatric Disease and Treatment* 2020;Volume 16:3153-61. doi: 10.2147/ndt.S282124  
11  
12  
13  
14  
15  
16  
17  
18  
19  
20  
21  
22  
23  
24  
25  
26  
27  
28  
29  
30  
31  
32  
33  
34  
35  
36  
37  
38  
39  
40  
41  
42  
43  
44  
45  
46  
47  
48  
49  
50  
51  
52  
53  
54  
55  
56  
57  
58  
59  
60

For peer review only

**STROBE** Statement—Checklist of items that should be included in reports of cross-sectional studies

|                                 |           |
|---------------------------------|-----------|
| <b>Title and abstract</b> ..... | <b>1</b>  |
| <b>Introduction</b> .....       | <b>3</b>  |
| Background/rational .....       | 3         |
| Objectives .....                | 4         |
| <b>Methods</b> .....            | <b>4</b>  |
| Study design .....              | 4         |
| Setting .....                   | 4         |
| Participants .....              | 4         |
| Variables .....                 | 5         |
| Data sources/measurement .....  | 5         |
| Bias .....                      | 5         |
| Study size .....                | 5         |
| Quantitative variables .....    | 5         |
| Statistical methods .....       | 5         |
| <b>Results</b> .....            | <b>6</b>  |
| Participants .....              | 6         |
| Descriptive data .....          | 6         |
| Outcome data .....              | 6         |
| Main results .....              | 6         |
| Other analyses .....            | 6         |
| <b>Discussion</b> .....         | <b>9</b>  |
| Key results .....               | 9         |
| Limitations .....               | 11        |
| Interpretation .....            | 11        |
| Generalisability .....          | 12        |
| <b>Other information</b> .....  | <b>12</b> |
| Funding .....                   | 12        |

# BMJ Open

## Factors associated with poor mental health outcomes in nurses in COVID-19-designated hospitals in the post-epidemic period in Guangdong Province: a cross-sectional study

|                                 |                                                                                                                                                                                                                                                                                                                                                                                                                                                   |
|---------------------------------|---------------------------------------------------------------------------------------------------------------------------------------------------------------------------------------------------------------------------------------------------------------------------------------------------------------------------------------------------------------------------------------------------------------------------------------------------|
| Journal:                        | <i>BMJ Open</i>                                                                                                                                                                                                                                                                                                                                                                                                                                   |
| Manuscript ID                   | bmjopen-2022-061116.R1                                                                                                                                                                                                                                                                                                                                                                                                                            |
| Article Type:                   | Original research                                                                                                                                                                                                                                                                                                                                                                                                                                 |
| Date Submitted by the Author:   | 27-May-2022                                                                                                                                                                                                                                                                                                                                                                                                                                       |
| Complete List of Authors:       | Zhang, Minrou; Shantou University Medical College, Department of Nursing; Guangdong Provincial People's Hospital, Guangdong Academy of Medical Sciences<br>Huang, Huigen; Guangdong Academy of Medical Sciences, Guangdong Academy of Medical Sciences; Shantou University Medical College<br>Chen, Han; Guangdong Academy of Medical Sciences, Guangdong Academy of Medical Sciences<br>Deng, Ya; Southern Medical University, school of nursing |
| <b>Primary Subject Heading</b>: | Mental health                                                                                                                                                                                                                                                                                                                                                                                                                                     |
| Secondary Subject Heading:      | Health services research, Mental health, Nursing                                                                                                                                                                                                                                                                                                                                                                                                  |
| Keywords:                       | MENTAL HEALTH, COVID-19, EPIDEMIOLOGY, Health & safety < HEALTH SERVICES ADMINISTRATION & MANAGEMENT                                                                                                                                                                                                                                                                                                                                              |
|                                 |                                                                                                                                                                                                                                                                                                                                                                                                                                                   |

SCHOLARONE™  
Manuscripts



I, the Submitting Author has the right to grant and does grant on behalf of all authors of the Work (as defined in the below author licence), an exclusive licence and/or a non-exclusive licence for contributions from authors who are: i) UK Crown employees; ii) where BMJ has agreed a CC-BY licence shall apply, and/or iii) in accordance with the terms applicable for US Federal Government officers or employees acting as part of their official duties; on a worldwide, perpetual, irrevocable, royalty-free basis to BMJ Publishing Group Ltd ("BMJ") its licensees and where the relevant Journal is co-owned by BMJ to the co-owners of the Journal, to publish the Work in this journal and any other BMJ products and to exploit all rights, as set out in our [licence](#).

The Submitting Author accepts and understands that any supply made under these terms is made by BMJ to the Submitting Author unless you are acting as an employee on behalf of your employer or a postgraduate student of an affiliated institution which is paying any applicable article publishing charge ("APC") for Open Access articles. Where the Submitting Author wishes to make the Work available on an Open Access basis (and intends to pay the relevant APC), the terms of reuse of such Open Access shall be governed by a Creative Commons licence – details of these licences and which [Creative Commons](#) licence will apply to this Work are set out in our licence referred to above.

Other than as permitted in any relevant BMJ Author's Self Archiving Policies, I confirm this Work has not been accepted for publication elsewhere, is not being considered for publication elsewhere and does not duplicate material already published. I confirm all authors consent to publication of this Work and authorise the granting of this licence.

1  
2  
3  
4 Factors associated with poor mental health outcomes in nurses in  
5  
6 COVID-19-designated hospitals in the post-epidemic period in  
7  
8 Guangdong Province: a cross-sectional study  
9  
10

11  
12 Minrou, Zhang<sup>2,1</sup>; Huigen Huang<sup>1,2,3</sup>; Hanxi, Chen<sup>1</sup>; Yafang, Deng<sup>3</sup>  
13

14 1 Guangdong Provincial People's Hospital, Guangdong Academy of  
15

16 Medical Sciences, Guangzhou, China  
17

18  
19 2 Shantou University Medical College, Shantou, China  
20

21  
22 3 School of Nursing, Southern Medical University, Guangzhou, China  
23  
24  
25  
26

27  
28 **Abstract**

29  
30 **Objective:** The early days of the COVID-19 pandemic placed enormous pressure and  
31  
32 subsequent negative psychological problems on nurses, but at this stage of the year-  
33  
34 long COVID-19 outbreak, the level of stress and negative emotions that nurses  
35  
36 experience is unclear. Our study attempted to assess the factors influencing mental  
37  
38 health status in nurses during the post-epidemic period of COVID-19.

39  
40 **Design:** Cross-sectional study.

41  
42 **Setting:** COVID-19 designated hospitals.

43  
44 **Participants:** 1,284 Chinese nurses.

45  
46 **Main outcome measures:** Electronic questionnaires, including the Chinese version of  
47  
48 the Perceived Stress Scale (CPSS) and Symptom Checklist-90 (SCL-90), were  
49  
50 distributed for self-evaluation. Regression analysis was used to analyze the associated  
51  
52 factors of psychological stress among variables such as age, years of nursing experience,  
53  
54 weekly working hours, anxiety symptoms, somatization symptoms, and compulsive  
55  
56 symptoms.  
57

58  
59 

---

Correspondence to  
60 Dr Huigen Huang; 13822221628@163.com

**Results:** A total of 1,284 respondents from COVID-19-designated hospitals in Guangdong Province were studied. The average CPSS score for all respondents was  $22.91 \pm 7.12$ . A total of 38.5% of respondents scored  $\geq 26$  on the CPSS, indicating a significant degree of psychological stress. Nurses with high psychological stress had higher levels of anxiety symptoms (41.7% vs. 8.0%), somatization symptoms (31.4% vs. 7.7%), and compulsion symptoms (62.3% vs. 27.0%) than nurses with low psychological stress. Stepwise multiple linear regression revealed that weekly working hours, years of nursing experience, anxiety symptoms, somatization symptoms, and compulsion symptoms had a linear relationship with the participants' psychological stress scores.

**Conclusion:** Nurses experienced significant physical and psychological risk while working in the post epidemic period. Our findings suggest that nurses still need support to protect their physical and mental health.

**Keywords:** COVID-19; pss14; scl-90; mental health; nurses

### Strengths and limitations of this study

- One of the largest samples of nurses conducted so far in China in COVID-19-designated hospitals in the post-epidemic period
- The following tools used were used alongside the collection of demographic information: The Chinese version of Perceived Stress Scale (CPSS) and Symptom Checklist -90 (SCL-90).
- Convenience sample that may have missed participants not using social media.
- The study used self-reported questionnaires; therefore, data obtained were participants' subjective perceptions.
- It is not clear whether the observed mental health outcomes have irreversible adverse physical and mental effects on nurses.

## INTRODUCTION

The COVID-19 epidemic has not only caused a big impact on economic and social development, but also brought great trauma to the whole society's mentality. After strenuous efforts, China's epidemic prevention and control situation is now developing positively, and has entered a "post-epidemic period" that integrates epidemic prevention and control with socio-economic development<sup>1 2</sup>. The post-epidemic period refers to the stage when the COVID-19 epidemic is effectively controlled, the epidemic prevention and control has changed from a surprise to a normal one, and the economic development of the entire society and people's daily life are gradually returning to a normal state<sup>3</sup>.

As of February 1, 2021, 101,039 confirmed cases, 93,726 discharged patients, and 4,826 deaths have been reported in China. There was one suspected case. A total of 967,415 close contacts were tracked, and 37,319 close contacts were still in medical observation<sup>4</sup>. According to the WHO, by February 28, 2020, more than 100 million people had been infected, and more than 2 million had died<sup>5</sup>. Due to the disease's highly contagious nature, the Chinese government set up designated hospitals to treat patients with symptoms of COVID-19 or those who had already been diagnosed, among which 30 hospitals in Guangdong Province have been designated as designated hospitals for COVID-19 treatment<sup>6</sup>. Depending on the nature of their work, nurses tend to work in close and long-term contact with patients<sup>7</sup>. This situation may lead to psychological problems for nurses in designated hospitals. Because the virus is transmitted mainly through respiratory droplets or by contact<sup>8</sup>, close environments, such as large gatherings and crowded places, can lead to clustered infections<sup>9</sup>.

In the early days of the COVID-19 outbreak, nurses risked their lives to contact patients every day. They were at high risk of infection, had a heavy workload, and suffer from



1  
2  
3  
4 psychological stress, anxiety and other negative psychological distress<sup>10 11</sup>, the mental  
5 health of nurses during the COVID-19 epidemic deserve more attention. As a result,  
6 during this period, numerous reports described physical and psychological morbidity  
7 associated with COVID-19<sup>12-15</sup>.  
8  
9  
10

11  
12  
13 The experience of severe acute respiratory syndrome (SARS) and Middle East  
14 Respiratory Syndrome (MERS) suggests that many health care workers (HCWs) remain  
15 mentally ill long after an outbreak is over, and that nurses suffer more than doctors<sup>16 17</sup>.  
16 Therefore, we can expect considerable collective mental health issues, such as stress,  
17 anxiety, and fear, over the duration of the COVID-19 pandemic. At present, although  
18 the COVID-19 epidemic has been well controlled in China, the virus has not been  
19 completely eliminated. New infections occur from time to time, which will inevitably  
20 impact nurses. It has been suggested that psychological fear is more dreadful than the  
21 disease itself<sup>18</sup>. However, nurses' mental health has been rarely documented over the  
22 course of the pandemic with a few exceptions.  
23  
24  
25  
26  
27  
28  
29  
30  
31  
32

33 In the current pandemic, although the spread of COVID-19 has been effectively  
34 contained in China, nurses who worked in designated hospitals have been under high  
35 pressure to deliver care in highly stressful environments<sup>19</sup>. For example, hospital  
36 administrators may restrict the movement of nurses once a COVID-19 patient is found  
37 in one place, and nurses often need to travel to different areas to support nucleic acid  
38 collection. In addition, nurses working in COVID-19-designated hospitals (like many  
39 other health care workers) are vulnerable to the risk of infection and unknowingly  
40 putting family members and friends at higher risk. Fear of infection may result in  
41 reluctance to seek help from family members or friends and may reduce nurses' ability  
42 to show compassion in the workplace<sup>20</sup>, to the detriment of the nursing profession in  
43 the long term.  
44  
45  
46  
47  
48  
49  
50  
51  
52  
53

54 Thus, our study examined nurses' mental health status and its influencing factors during  
55 a period of COVID-19 containment and normalization.  
56  
57

## 58 **METHODS**

59  
60

## Design and setting

In this study, we recruited nurses from designated hospitals in Guangdong Province through the nursing branch of Guangdong Health Economics Association. We conducted a cross-sectional study between January 23 and 31, 2021 using snowball and convenience sampling of nurses. This survey used Ranxing Technology “SurveyStar” (www.wjx.cn), and QR scan codes to access the questionnaire were posted on WeChat to collect information from participants. At this questionnaire star link, nurses received guidance on how to complete and answer the questions. Before entering the questionnaire, there is an informed consent form to be filled in. Choose “yes”, continue to complete the questionnaire. Choose “No”, then you will not enter the filling in the questionnaire. Participants accessed this survey using the questionnaire star link or QR scan code over a period of nine days.

## Participants

The sample size was estimated based on WHO recommendations on the minimum sample size required for epidemiological studies<sup>21 22</sup>. The confidence interval was 95%, the standard deviation was 0.5, the margin of error was 0.5. Finally, with addition of a 10% contingency for non-response, the minimum sample size was 423. Guangdong Province has 30 provincial-level designated hospitals<sup>6</sup>. All nurses who were at least 18 years of age and worked in COVID-19-designated hospitals in Guangdong Province were eligible for participation and 1,345 nurses returned the questionnaire. IP addresses and other personal information were protected for privacy reasons. Respondents who failed to provide informed consent or took more than 60 minutes to complete the questionnaire were excluded from further consideration, resulting in a total of 1,284 valid responses.

## Instrumentation

After literature research and discussion by the research team, we believe that gender, age, marital status, years of nursing experience, technical title, weekly working hours, and COVID-19 vaccination status may have an impact on the psychological status of nurses in the post-epidemic period. Therefore, we selected these contents as the social demographic data of nurses. The two instruments used in this study were the Chinese

version of the Perceived Stress Scale (CPSS) and the Symptom Checklist 90 (SCL-90). The Perceived Stress Scale (PSS), also known as the Cohen PSS, is the most widely used psychological instrument for measuring the perception of stress<sup>23</sup>. In 2003, Yang et al.<sup>24</sup> translated the PSS into Chinese, and the Cronbach's alpha coefficient was 0.78 after adjustment. Referring to Hewitt<sup>25</sup> (1992), we divided the Chinese version of the PSS into two dimensions of "perceived distress" and "perceived coping ability" and conducted reliability and validity tests on nurses. The Cronbach's alpha coefficients of the total scale and the two dimensions were 0.837, 0.816, and 0.901, respectively. Scores on the CPSS range from 0 to 56, and the higher the score, the greater the psychological stress. The health risk stress standard for Chinese was 26<sup>24</sup>. Therefore, we defined a CPSS score higher than 26 as high psychological stress.

The SCL-90 is a psychosomatic screening scale proposed by Derogatis<sup>26</sup>, and is widely used in China and elsewhere. In 1986, Chinese scholars applied the SCL-90 to the adult population and obtained the norm of each factor of the SCL-90. In 2017, a meta-analysis obtained the norm of the nurse population<sup>27</sup>. The SCL-90 is composed of 90 questions, and each item has five answer choices using five levels (between 1-5, none = 1, too much = 5). The symptom of interest was considered when the factor score was  $\geq 2$ . In this survey, we chose the anxiety, somatization, and compulsion subscale scores for analysis. The Cronbach's alpha coefficients of the anxiety, somatization, and compulsion subscales were 0.921, 0.908, and 0.908, respectively.

### **Ethical issues**

Ethical approval was obtained from the Ethics Committee of the Guangdong Provincial People's Hospital, Guangdong Academy of Medical Sciences (approval number: KY-Q-2021-023-01).

### **Statistical analysis**

Data were entered into EXCEL and SPSS Statistics for Window, Version 23.0 was used for statistical analysis. The counting data were described by frequency and composition ratios, and the measurement data were expressed as  $X \pm s$ . We divided anxiety, somatization, and compulsion factor scores that were  $\geq 2$  into one group and  $< 2$  into the other group. Psychological stress score  $\geq 26$  and  $< 26$  were divided into two groups. Independent sample T

test was used to compare the two groups and the Chi-square  $X^2$  was used for univariate analysis. Stepwise multiple linear regression analysis was used to evaluate the factors associated with psychological stress. The standard of significance was  $P < 0.05$ .

### **Patient and public involvement**

No patient involved.

## **RESULTS**

There was a total of 1,345 respondents from COVID-19-designated hospitals in Guangdong Province. We excluded respondents who disagreed with the survey ( $n = 22$ ) and took too long to complete the questionnaire ( $n = 39$ ), resulting in a final analytic sample of 1,284 respondents, yielding a 95.5% response rate. The questionnaire completion time was  $476.03 \pm 322.93$  seconds. Respondents were primarily female (95.7%), over the age of 30 (56.9%), married (70.2%), and had more than 10 years of work experience as a nurse (48%). Table 1 list the psychological stress scores of nurses in COVID-19 designated hospitals with different demographic characteristics.

The mean score of psychological stress measured by the CPSS was  $22.91 \pm 7.12$ . In our study, 38.5% of respondents reported high psychological stress ( $n = 494$ ), and 61.5% of respondents reported low psychological stress ( $n = 790$ ). Table 2 list the scoring of the psychological stress.

We divided the respondents into two groups: 1) one group is those with psychological stress scores  $\geq 26$  and 2) another group is those with psychological stress scores score  $< 26$ . First, we compared the scores of each dimension between the two groups, as shown in Table 3. We then conducted univariate analysis. The results showed that there was no significant difference in psychological stress by gender or COVID-19 vaccination status ( $P > 0.05$ ). The results revealed a significant difference in age ( $x^2 = 14.912, p = 0.170$ ), marital status ( $x^2 = 7.648, p = 0.022$ ), years of work experience as a nurse ( $x^2 = 18.360, p = 0.001$ ), technical title ( $x^2 = 15.659, p = 0.001$ ), weekly working hours ( $x^2 = 16.675, p < 0.001$ ), anxiety symptoms ( $x^2 = 208.748, p < 0.001$ ), somatization symptoms ( $x^2 = 121.546, p < 0.001$ ), and compulsion symptoms ( $x^2 = 157.842, p < 0.001$ ). In addition, people who worked more than 40 hours a week

reported higher levels of psychological stress than those who worked 35-40 hours a week ( $p < 0.001$ ). Table 4 summarizes the results.

We defined the total psychological stress scores as the dependent variable, and the significant variables from the univariate analysis in Table 4 as the independent variables. Our analysis showed that having less than 15 years of nursing service ( $\beta = -0.100, p < 0.001$ ), working more than 40 hours a week ( $\beta = 0.087, p < 0.001$ ), anxiety symptoms ( $\beta = 0.235, p < 0.001$ ), somatization symptoms ( $\beta = 0.095, p = 0.002$ ) and compulsion symptoms ( $\beta = 0.266, p < 0.001$ ) were identified as risk factors for psychological stress (Table 5).

Table 1 Psychological stress scores of nurses in COVID-19 designated hospitals with different demographic characteristics(N=1284).

| Variables                          | N (%)               | Psychological stress scores<br>$\bar{x} \pm s$ | 95% CI      |             |       |
|------------------------------------|---------------------|------------------------------------------------|-------------|-------------|-------|
|                                    |                     |                                                | Lower Bound | Upper Bound |       |
| Gender                             | male                | 55(4.3%)                                       | 23.25±6.66  | 21.45       | 25.06 |
|                                    | female              | 1229(95.7%)                                    | 22.89±7.14  | 22.49       | 23.29 |
| Age (year)                         | ≤25                 | 193(15.0%)                                     | 23.87±6.75  | 22.91       | 24.83 |
|                                    | 26-30               | 359(28.0%)                                     | 23.47±7.21  | 22.72       | 24.22 |
|                                    | 31-35               | 315(24.5%)                                     | 22.82±6.87  | 22.06       | 23.58 |
|                                    | 36-40               | 188(14.6%)                                     | 22.53±7.13  | 21.50       | 23.55 |
|                                    | ≥41                 | 229(17.8%)                                     | 21.66±7.45  | 20.69       | 22.63 |
| Marital status                     | Married             | 902(70.2%)                                     | 22.51±7.24  | 22.04       | 22.99 |
|                                    | Unmarried           | 371(28.9%)                                     | 23.86±6.68  | 23.18       | 24.55 |
|                                    | Others              | 11(0.9%)                                       | 23.36±8.32  | 17.77       | 28.95 |
| Years of nursing experience (year) | ≤5                  | 344(26.8%)                                     | 23.49±6.72  | 22.77       | 24.20 |
|                                    | 6-10                | 324(25.2%)                                     | 23.58±7.27  | 22.79       | 24.38 |
|                                    | 11-15               | 258(20.1%)                                     | 22.17±7.28  | 22.17       | 23.95 |
|                                    | 16-20               | 153(11.9%)                                     | 21.64±6.64  | 20.58       | 22.70 |
|                                    | ≥21                 | 205(16.0%)                                     | 21.64±7.42  | 20.62       | 22.67 |
| Technical Title                    | Nurses              | 348(27.1%)                                     | 23.72±6.68  | 23.01       | 24.41 |
|                                    | Nurse Practitioners | 570(44.4%)                                     | 22.97±7.34  | 22.37       | 23.58 |
| Technical Title                    | Nurse Supervisor    | 312(24.3%)                                     | 22.33±7.18  | 21.53       | 23.13 |
|                                    | Associate           |                                                |             |             |       |
|                                    | Senior and above    | 54(4.2%)                                       | 20.41±6.38  | 18.67       | 22.15 |
| Weekly working                     | <35                 | 51(4.0%)                                       | 22.65±8.27  | 20.32       | 24.97 |
|                                    | 35-40               | 549(42.8%)                                     | 22.02±6.78  | 21.45       | 22.59 |

|                           |          |             |            |       |       |
|---------------------------|----------|-------------|------------|-------|-------|
| hours                     | >40      | 684(53.3%)  | 23.64±7.21 | 23.10 | 24.19 |
| Vaccination with COVID-19 | Yes      | 317(24.7%)  | 22.88±6.72 | 22.14 | 23.63 |
|                           | No       | 967(75.3%)  | 22.92±7.25 | 22.46 | 23.38 |
| Anxiety symptoms          | Yes (≥2) | 269(21.0%)  | 29.06±5.73 | 28.37 | 29.75 |
|                           | No (<2)  | 1015(79.0%) | 21.28±6.53 | 20.88 | 21.68 |
| somatization symptoms     | Yes (≥2) | 216(16.8%)  | 28.69±6.30 | 27.84 | 29.54 |
|                           | No (<2)  | 1068(83.2%) | 21.74±6.69 | 21.34 | 22.14 |
| compulsion symptoms       | Yes (≥2) | 521(40.6%)  | 26.79±6.05 | 26.27 | 27.31 |
|                           | No (<2)  | 763(59.4%)  | 20.26±6.56 | 19.80 | 20.73 |

Table 2 Scoring of the psychological stress(N=1284).

| Variables            | N (%)      | $\bar{x} \pm s$ | 95% CI      |             |
|----------------------|------------|-----------------|-------------|-------------|
|                      |            |                 | Lower Bound | Upper Bound |
| Psychological stress | 1284(100%) | 22.91±7.12      | 22.52       | 23.30       |
| High (≥26)           | 494(38.5%) | 29.76±3.84      | 29.42       | 30.10       |
| Low (<26)            | 790(61.5%) | 18.63±5.04      | 18.28       | 18.98       |
| Perceived Distress   | 1284(100%) | 11.60±4.32      | 11.36       | 11.83       |
| Perceived coping     | 1284(100%) | 11.31±4.98      | 11.04       | 11.59       |

Table 3 A comparison of scores across different dimensions between the two groups(N=1284).

| Variables            | psychological stress scores | psychological stress scores | <i>t</i> | <i>p</i> | 95%CI       |             |
|----------------------|-----------------------------|-----------------------------|----------|----------|-------------|-------------|
|                      | ≥26<br>$\bar{x} \pm s$      | <26<br>$\bar{x} \pm s$      |          |          | Lower bound | Upper bound |
| psychological stress | 29.76±3.84                  | 18.63±5.04                  | 42.019   | ..000*   | 10.610      | 11.649      |
| perceived distress   | 14.29±4.41                  | 9.91±3.28                   | 19.017   | ..000*   | 3.929       | 4.833       |
| perceived coping     | 15.47±3.89                  | 8.72±3.65                   | 31.440   | ..000*   | 6.327       | 7.169       |

\**P*<0.05.

Table 4 Univariate analyses of the factors associated with psychological stress(N=1284).

| Variables | Psychologic al stress scores≥26 | Psychologic al stress scores<26 | <i>x</i> <sup>2</sup> | <i>p</i> |
|-----------|---------------------------------|---------------------------------|-----------------------|----------|
|           | (n=494)                         | (n=790)                         |                       |          |
| Gender    | male<br>26(5.3%)                | 29(3.7%)                        | 1.879                 | .170     |
|           | female<br>468(94.7%)            | 761(96.3%)                      |                       |          |

|                                   |                            |            |            |         |       |
|-----------------------------------|----------------------------|------------|------------|---------|-------|
|                                   | ≤25                        | 90(18.2%)  | 103(13.0%) |         |       |
|                                   | 26-30                      | 148(30.0%) | 211(26.7%) |         |       |
| Age (year)                        | 31-35                      | 123(24.9%) | 192(24.3%) | 14.912  | .005* |
|                                   | 36-40                      | 64(13.0%)  | 124(15.7%) |         |       |
|                                   | ≥41                        | 69(14.0%)  | 160(20.3%) |         |       |
|                                   | Married                    | 325(65.8%) | 577(73.0%) |         |       |
| Marital status                    | Single                     | 164(33.2%) | 207(26.2%) | 7.648   | .022* |
|                                   | Others                     | 5(1.0%)    | 6(.8%)     |         |       |
|                                   | ≤5                         | 145(29.4%) | 199(25.2%) |         |       |
|                                   | 6-10                       | 141(28.5%) | 183(23.2%) |         |       |
| Years of nursing experience(year) | 11-15                      | 103(20.9%) | 155(19.6%) | 18.360  | .001* |
|                                   | 16-20                      | 44(8.9%)   | 109(13.8%) |         |       |
|                                   | ≥21                        | 61(12.3%)  | 144(18.2%) |         |       |
|                                   | Nurses                     | 151(30.6%) | 197(24.9%) |         |       |
|                                   | Nurse Practitioners        | 229(46.4%) | 341(43.2%) |         |       |
|                                   | Nurse Supervisor           | 103(20.9%) | 209(26.5%) | 15.659  | .001* |
| Technical Title                   | Associate Senior and above | 11(2.2%)   | 43(5.4%)   |         |       |
|                                   | <35                        | 22(4.5%)   | 29(3.7%)   |         |       |
| Weekly working hours              | 35-40                      | 176(35.6%) | 373(47.2%) | 16.675  | .000* |
|                                   | >40                        | 296(59.9%) | 388(49.1%) |         |       |
|                                   | Yes                        | 121(24.5%) | 196(24.8%) | 0.016   | .898  |
| Vaccination with COVID-19         | No                         | 373(75.5%) | 594(75.2%) |         |       |
|                                   | Yes (≥2)                   | 206(41.7%) | 63(8.0%)   | 208.748 | .000* |
| Anxiety symptoms                  | No (<2)                    | 288(58.3%) | 727(92.0%) |         |       |
|                                   | Yes (≥2)                   | 155(31.4%) | 61(7.7%)   | 121.546 | .000* |
| somatization symptoms             | No (<2)                    | 339(68.6%) | 729(92.3%) |         |       |
|                                   | Yes (≥2)                   | 308(62.3%) | 213(27.0%) | 157.842 | .000* |
| compulsion symptoms               | No (<2)                    | 186(27.7%) | 577(73%)   |         |       |

\* $P < 0.05$ .

Table 5 Multivariate liner regression analysis of psychological stress(N=1284).

| Variables                   | <i>B</i> | <i>SE</i> | $\beta$ | <i>p</i> | 95% <i>CI</i> |             |
|-----------------------------|----------|-----------|---------|----------|---------------|-------------|
|                             |          |           |         |          | Lower Bound   | Upper Bound |
| compulsion symptoms         | 3.859    | 0.428     | 0.266   | 0.000    | 3.019         | 4.699       |
| Anxiety symptoms            | 4.102    | 0.574     | 0.235   | 0.000    | 2.975         | 5.229       |
| Years of nursing experience | -0.509   | 0.122     | -0.100  | 0.000    | -0.748        | -0.270      |
| Weekly working hours        | 1.075    | 0.295     | 0.087   | 0.000    | 0.496         | 1.653       |
| somatization symptoms       | 1.812    | 0.597     | 0.095   | 0.002    | 0.640         | 2.983       |

---

$R^2 = 0.278$ , adjust  $R^2 = 0.275$ ,  $F = 98.510$ ,  $p < 0.001$ .

## DISCUSSION

In the study, we found some mental health problems among nurses during the normalization of COVID-19 prevention and control. First, although the whole sample showed that nurses were experiencing relatively normal levels of psychological stress, 38.5% of nurses had a high level of stress, which is a significant portion that cannot be ignored. Second, the ability to perceive stress in the high psychological stress group was higher than that in the low psychological stress group, and this difference was statistically significant. Third, in the study, 21% of nurses reported anxiety, 16.8% of nurses reported somatization and 40.6% reported obsessive-compulsive symptoms. Finally, the results of this study also indicate that anxiety, somatization, and obsessive-compulsive symptoms can aggravate nurses' psychological stress.

Our study revealed that the median level of psychological stress among nurses was 23. Other studies found higher levels of psychological stress among students and other health workers in the early stages of the COVID-19 outbreak<sup>28 29</sup>. We found that 98.5% of nurses were taught about infectious diseases. Psychological effects of COVID-19 were more common among health care workers without medical training than among those with medical training<sup>30</sup>. Over time, adaptive responses to stress and the positive effects of infection control training may be protective<sup>31</sup>. Scholars investigated the psychological status of HCWs during SARS and found that 39.3% of the general population had elevated psychological stress levels<sup>32</sup>, while approximately 38.5% of the nurses in our study showed high psychological stress. This reduction may be related to experience in the fight against COVID-19 today and the timely and effective response to the epidemic, and its prevention and control in Guangdong<sup>33</sup>. It could also be that the COVID-19 epidemic in Guangdong province was relatively stable during the study survey period.

Our study identified weekly working hours, and symptoms of anxiety, somatization, and compulsiveness as potential risk factors for psychological stress in nurses, whereas years of nursing experience was protective against the development of psychological



1  
2  
3  
4 stress. Nurses who worked more than 40 hours a week reported significantly higher  
5 levels of psychological stress than those who worked less than 40 hours a week. This  
6 result may be related to extended work hours leading to nursing errors, such as patient  
7 identification errors, communication errors, and patient complaints<sup>34</sup>. At the same time,  
8 longer work hours may result in more severe conflicts between work-life balance for  
9 female workers<sup>35</sup>. In the post-epidemic period, when there are sporadic cases of  
10 COVID-19 infection, the longer the working hours, the higher the probability of nurses  
11 in designated hospitals being exposed to patients, the higher probability of being  
12 infected with the virus, and the greater their psychological stress. Years of nursing  
13 experience being a protective factor may be attributed to greater capabilities to cope  
14 with emergencies and improved psychological quality.

15  
16  
17  
18  
19  
20  
21  
22  
23  
24  
25 A certain level of psychological stress can lead to psychological disorders, such as  
26 anxiety and somatization symptoms. Conversely, anxiety and somatization symptoms  
27 can also cause psychological stress to rise<sup>36</sup>. In the high psychological stress group, we  
28 found that 41.7% and 31.4% of nurses suffered from anxiety and somatization,  
29 respectively. Huang et al. reported that the percentages of anxiety and somatization  
30 were 33.02% and 7.59%, respectively, in the Chinese population<sup>37</sup>, which are lower  
31 than that of the nurses in our study. This result may be attributed to the fact that nurses  
32 are more likely to be exposed to COVID-19 than those in the general population.  
33 However, Li et al. reported that the frequencies of symptoms of anxiety and  
34 somatization symptoms were 45.4% and 12.0%, respectively<sup>38</sup>. In our survey, 26.1%  
35 of nurses received psychological counseling, which may have led to a slight decrease  
36 in anxiety symptoms. However, spending increasingly more time working in high-  
37 pressure environment may cause nurses to develop headaches and other somatic  
38 symptoms. Compulsive symptoms were reported in 62.3% of nurses, which contrasts  
39 with an online survey of 927 Chinese medical workers conducted between February 19  
40 and March 6, 2020 which showed a prevalence of compulsive symptoms of only 5.3%<sup>15</sup>.  
41 The reason for this large discrepancy may be that 85.1% of the latter medical staff were  
42 not at risk of exposure to COVID-19 patients in the hospital.

43  
44  
45  
46  
47  
48  
49  
50  
51  
52  
53  
54  
55  
56  
57  
58  
59  
60 Our findings have important clinical implications for alleviating high levels of

1  
2  
3  
4 psychological stress in nurses. Reasonable work schedules and proper education on  
5 infection control can relieve nurses experiencing high psychological stress. Therefore,  
6 in the post-epidemic period, hospital managers can strengthen nurses' safety training  
7 including found COVID-19 patients with emergency drills and the right to wear  
8 protective clothing and wear goggles, the rational allocation of human resources, reduce  
9 the work intensity of nurses and other ways to reduce the occurrence of adverse  
10 psychological outcomes for nurses.  
11  
12  
13  
14  
15  
16

### 17 **Limitations**

18  
19 We acknowledge that our study has some limitations. First, although we had a large  
20 sample size and attempted to capture all nurses working at designated hospitals, male  
21 nurse population in designated hospitals in Guangdong Province were underrepresented,  
22 and we did not take into account that nurses have different specialties in different  
23 departments. Second, self-report questionnaires were used in this study, and the data  
24 obtained were participants' perceptions, which are highly subjective. Third, this study  
25 can only highlight the status quo of psychological stress, anxiety, compulsion, and  
26 somatization of nurses during the investigation period and cannot determine whether  
27 there are irreversible adverse physical and mental effects on nurses. Finally, the study  
28 was conducted online using convenience sampling, which may have missed some  
29 participants.  
30  
31  
32  
33  
34  
35  
36  
37  
38  
39

40 Despite the above limitations, our study provided valuable information on the  
41 psychological impact of the COVID-19 pandemic on nurses in China. People's mental  
42 conditions will change with time and the environment, as will their psychological stress.  
43 Therefore, coping strategies across periods may differ, and the effectiveness of these  
44 strategies needs further study. Further research will need to expand our findings with  
45 additional surveys in other provinces in China.  
46  
47  
48  
49  
50  
51

### 52 **CONCLUSION**

53  
54 This survey found that 38.5% of nurses still suffered high psychological stress, and  
55 there was a significant association between anxiety symptoms, somatization symptoms,  
56 compulsion symptoms, with psychological stress. Considering the current situation, we  
57  
58  
59  
60

1  
2  
3  
4 suggest using an online platform to provide psychological support for nurses. For nurses  
5 with severe psychiatric symptoms or even somatic symptoms, we recommend  
6 individualized psychological support and interventions after ruling out infection. The  
7 COVID-19 pandemic is a public health challenge that puts health systems in a highly  
8 vulnerable position<sup>28</sup>. Nurses are an important part of the health care system. Therefore,  
9 we must ensure the physical and mental health of nurses to help them meet the future  
10 challenges in their future careers.  
11  
12  
13  
14  
15  
16

17 **Acknowledgments** We thank all the nursing departments of 30 designated hospitals in  
18 Guangdong Province, China, for their support for our study.  
19

20  
21 **Contributor** Minrou, Zhang was involved in the conception of the study, data  
22 collection, analysis, and writing of the main manuscript. Huigen, Huang, the  
23 corresponding author, was involved in conception, data collection, analysis, and critical  
24 revision of the manuscript. Hanxi, Chen was involved in conception. Yafang, Deng was  
25 involved in the data analysis. All authors approved the final manuscript.  
26  
27  
28  
29

30  
31 **Funding** This study was supported by Guangdong Provincial People' Hospital,  
32 Guangdong Academy of Medical Sciences no.7217040210.  
33  
34

35 **Competing interests** None.  
36

37 **Patient consent for publication** Not required.  
38

39 **Provenance and peer review** Not commissioned; externally peer reviewed.  
40

41 **Date availability statement** No additional data available.  
42

## 43 References

- 44 1. (2020) GGoCER, Institute of Economics C. The Changing Global Economic Landscape and China's  
45 Potential Growth Rate and High-quality Development in the Post-epidemic Era. *Economic*  
46 *Research Journal* 2020;55(8):4-23.
- 47 2. Ping X, Ming L. Change of Social Mentality and Comprehensive Treatment in Post-Epidemic Period.  
48 *Forward Position* 2021(1):91-95,103.
- 49 3. LiaoNing L, ShengMing N. The new situation and new actions of ideological and political education in  
50 the post-epidemic period. *Xuexiao Dangjian Yu Sixiang Jiaoyu* 2020(15):4-8. doi:  
51 10.19865/j.cnki.xxdj.2020.15.001
- 52 4. Commission CNHaW. Update on the new coronavirus pneumonia outbreak as of 24:00 on February  
53 1 2021 [updated 02-02. Available from:  
54 <http://www.nhc.gov.cn/yjb/s7860/202102/0d8063f3406d4897ae63cd323f724f76.shtml>  
55 accessed 02-03 2021.
- 56 5. Organization WH. WHO Coronavirus Disease (COVID-19) Dashboard 2021 [updated 02-28. Available  
57  
58  
59  
60

- from: <https://covid19.who.int/>. accessed 03-01 2021.
6. Commission GPH. Provincial designated hospitals for COVID-19 in Guangdong Province(30) 2020 [updated 2020-01-22. Available from: [http://wsjkw.gd.gov.cn/gkmlpt/content/2/2878/mmpost\\_2878316.html#2571](http://wsjkw.gd.gov.cn/gkmlpt/content/2/2878/mmpost_2878316.html#2571) accessed 05-13 2022.
  7. Galletta M, Piras I, Finco G, et al. Worries, Preparedness, and Perceived Impact of Covid-19 Pandemic on Nurses' Mental Health. *Front Public Health* 2021;9:566700. doi: 10.3389/fpubh.2021.566700 [published Online First: 2021/06/15]
  8. Li Q, Guan X, Wu P, et al. Early Transmission Dynamics in Wuhan, China, of Novel Coronavirus-Infected Pneumonia. *N Engl J Med* 2020;382(13):1199-207. doi: 10.1056/NEJMoa2001316 [published Online First: 2020/01/30]
  9. Wang Y, Di Y, Ye J, et al. Study on the public psychological states and its related factors during the outbreak of coronavirus disease 2019 (COVID-19) in some regions of China. *Psychol Health Med* 2021;26(1):13-22. doi: 10.1080/13548506.2020.1746817 [published Online First: 2020/04/01]
  10. Nursing CJo. Nurses play a key role in addressing human health challenges. *Chinese Journal of Nursing* 2020;55(4):485-88.
  11. Xinjuan W, Yu W, Hongpeng L. Thoughts for the value of nursing under the situation of normalized Corona Virus Disease 2019 prevention and control. *Chinese Nursing Management* 2021;21(5):641-45. doi: 10.3969/j.issn.1672-1756.2021.05.001
  12. Alshekaili M, Hassan W, Al Said N, et al. Factors associated with mental health outcomes across healthcare settings in Oman during COVID-19: frontline versus non-frontline healthcare workers. *BMJ Open* 2020;10(10):e042030. doi: 10.1136/bmjopen-2020-042030 [published Online First: 2020/10/12]
  13. Song X, Fu W, Liu X, et al. Mental health status of medical staff in emergency departments during the Coronavirus disease 2019 epidemic in China. *Brain Behav Immun* 2020;88:60-65. doi: 10.1016/j.bbi.2020.06.002 [published Online First: 2020/06/09]
  14. Chew NWS, Lee GKH, Tan BYQ, et al. A multinational, multicentre study on the psychological outcomes and associated physical symptoms amongst healthcare workers during COVID-19 outbreak. *Brain Behav Immun* 2020;88:559-65. doi: 10.1016/j.bbi.2020.04.049 [published Online First: 2020/04/25]
  15. Zhang WR, Wang K, Yin L, et al. Mental Health and Psychosocial Problems of Medical Health Workers during the COVID-19 Epidemic in China. *Psychother Psychosom* 2020;89(4):242-50. doi: 10.1159/000507639 [published Online First: 2020/04/10]
  16. Carmassi C, Foghi C, Dell'Oste V, et al. PTSD symptoms in healthcare workers facing the three coronavirus outbreaks: What can we expect after the COVID-19 pandemic. *Psychiatry research* 2020;292:113312. doi: 10.1016/j.psychres.2020.113312 [published Online First: 2020/07/28]
  17. Tham KY, Tan YH, Loh OH, et al. Psychiatric morbidity among emergency department doctors and nurses after the SARS outbreak. *Annals of the Academy of Medicine, Singapore* 2004;33(5 Suppl):S78-9. [published Online First: 2005/01/18]
  18. Chinanews. Zhongnanshan:more attention should be paid to mental health in epidemic treatment. *Chinanews* 2020.
  19. Leng M, Wei L, Shi X, et al. Mental distress and influencing factors in nurses caring for patients with COVID-19. *Nurs Crit Care* 2021;26(2):94-101. doi: 10.1111/nicc.12528 [published Online First:

- 2021/01/16]
20. Alharbi J, Jackson D, Usher K. Personal characteristics, coping strategies, and resilience impact on compassion fatigue in critical care nurses: A cross-sectional study. *Nurs Health Sci* 2020;22(1):20-27. doi: 10.1111/nhs.12650 [published Online First: 2019/11/02]
  21. Tesfaye Y, Agenagnew L, Anand S, et al. Knowledge of the community regarding mental health problems: a cross-sectional study. *BMC Psychol* 2021;9(1):106. doi: 10.1186/s40359-021-00607-5 [published Online First: 2021/07/16]
  22. Naser AY, Dahmash EZ, Al-Rousan R, et al. Mental health status of the general population, healthcare professionals, and university students during 2019 coronavirus disease outbreak in Jordan: A cross-sectional study. *Brain Behav* 2020;10(8):e01730. doi: 10.1002/brb3.1730 [published Online First: 2020/06/25]
  23. Klein EM, Braehler E, Dreier M, et al. The German version of the Perceived Stress Scale - psychometric characteristics in a representative German community sample. *BMC Psychiatry* 2016;16:159. doi: 10.1186/s12888-016-0875-9 [published Online First: 2016/05/25]
  24. Ting-zhong Y, Han-teng H. An epifirmiological study among urban residents in social transition period. *Chin J Epidemiol* 2003;24(9):760-64. doi: 10.3760/j.issn:0254-6450.2003.09.004
  25. Hewitt PL, Flett GL, Monsher SW. The Preceived Stress Scale: Factor structure and relation to depression symptoms in a psychiatric sample. *Journal of Psychopathology and Behavioral Assessment* 1992;14(3):247-57. doi: 10.1007/bf00962631
  26. Derogatis LR, Rickels K, Rock AF. The SCL-90 and the MMPI: a step in the validation of a new self-report scale. *Br J Psychiatry* 1976;128:280-9. doi: 10.1192/bjp.128.3.280 [published Online First: 1976/03/01]
  27. Fang B, Caixia L. Meta-analysis of mental health investigation for Chinese nurses evaluted by SCL-90 during recent 5 years. *Journal of Nursing Science* 2017;32(5):1-4. doi: 10.3870/j.issn.1001-4152.2017.05.001
  28. Gonzalez-Gil MT, Gonzalez-Blazquez C, Parro-Moreno AI, et al. Nurses' perceptions and demands regarding COVID-19 care delivery in critical care units and hospital emergency services. *Intensive Crit Care Nurs* 2021;62:102966. doi: 10.1016/j.iccn.2020.102966 [published Online First: 2020/11/12]
  29. Aslan I, Ochnik D, Cinar O. Exploring Perceived Stress among Students in Turkey during the COVID-19 Pandemic. *Int J Environ Res Public Health* 2020;17(23) doi: 10.3390/ijerph17238961 [published Online First: 2020/12/06]
  30. Tan BYQ, Chew NWS, Lee GKH, et al. Psychological Impact of the COVID-19 Pandemic on Health Care Workers in Singapore. *Annals of internal medicine* 2020;173(4):317-20. doi: 10.7326/m20-1083 [published Online First: 2020/04/07]
  31. Chua SE, Cheung V, Cheung C, et al. Psychological effects of the SARS outbreak in Hong Kong on high-risk health care workers. *Canadian journal of psychiatry Revue canadienne de psychiatrie* 2004;49(6):391-3. doi: 10.1177/070674370404900609 [published Online First: 2004/07/31]
  32. Shu-hong L, Ben-chun T, Ting-zhong Y, et al. Perceived stress ingeneral public during prevalence of severe acute. *Chin J Prev Med* 2010;44(2):128-33. doi: 10.3760/cma.j.issn.0253-9624.2010.02.009
  33. Qian-yi L, Chan Y, Dong-ao Z, et al. Investigation of mental health status of frontline medical staff in COVID-19 treatment hospital in Guangdong Province. *Guangdong Medical Journal* 2020;41(10):984-90. doi: 10.13820/j.cnki.gdyx.20200920

- 1  
2  
3  
4  
5  
6  
7  
8  
9  
10  
11  
12  
13  
14  
15  
16  
17  
18  
19  
20  
21  
22  
23  
24  
25  
26  
27  
28  
29  
30  
31  
32  
33  
34  
35  
36  
37  
38  
39  
40  
41  
42  
43  
44  
45  
46  
47  
48  
49  
50  
51  
52  
53  
54  
55  
56  
57  
58  
59  
60
34. Kunaviktikul W, Wichaikhum O, Nantsupawat A, et al. Nurses' extended work hours: Patient, nurse and organizational outcomes. *International nursing review* 2015;62(3):386-93. doi: 10.1111/inr.12195 [published Online First: 2015/05/23]
35. Shanafelt TD, Noseworthy JH. Executive Leadership and Physician Well-being: Nine Organizational Strategies to Promote Engagement and Reduce Burnout. *Mayo Clin Proc* 2017;92(1):129-46. doi: 10.1016/j.mayocp.2016.10.004 [published Online First: 2016/11/23]
36. Chen B. The study on management strategy of public health emergency based on the adjustment of Systematic Strain [Thesis]. Zhejiang University, 2007.
37. Huang Y, Wang Y, Zeng L, et al. Prevalence and Correlation of Anxiety, Insomnia and Somatic Symptoms in a Chinese Population During the COVID-19 Epidemic. *Front Psychiatry* 2020;11:568329. doi: 10.3389/fpsy.2020.568329 [published Online First: 2020/10/03]
38. Li H, Zhang Y, Wang H, et al. <p>The Relationship Between Symptoms of Anxiety and Somatic Symptoms in Health Professionals During the Coronavirus Disease 2019 Pandemic</p>. *Neuropsychiatric Disease and Treatment* 2020;Volume 16:3153-61. doi: 10.2147/ndt.S282124

**STROBE** Statement—Checklist of items that should be included in reports of cross-sectional studies

|                                 |           |
|---------------------------------|-----------|
| <b>Title and abstract</b> ..... | <b>1</b>  |
| <b>Introduction</b> .....       | <b>3</b>  |
| Background/rational .....       | 3         |
| Objectives .....                | 4         |
| <b>Methods</b> .....            | <b>4</b>  |
| Study design .....              | 4         |
| Setting .....                   | 4         |
| Participants .....              | 5         |
| Variables .....                 | 5         |
| Data sources/measurement .....  | 5         |
| Bias .....                      | 5         |
| Study size .....                | 5         |
| Quantitative variables .....    | 5         |
| Statistical methods .....       | 6         |
| <b>Results</b> .....            | <b>7</b>  |
| Participants .....              | 7         |
| Descriptive data .....          | 7         |
| Outcome data .....              | 7         |
| Main results .....              | 7         |
| Other analyses .....            | 7         |
| <b>Discussion</b> .....         | <b>11</b> |
| Key results .....               | 11        |
| Limitations .....               | 13        |
| Interpretation .....            | 13        |
| Generalisability .....          | 14        |
| <b>Other information</b> .....  | <b>14</b> |
| Funding .....                   | 14        |
